# Supplementary material for: Gene regulatory network reveals oxidative stress as the underlying molecular mechanism of type 2 diabetes and hypertension
Source: Springer Nature journal article supplement (doi:10.1186/1755-8794-3-45), 2010-10-13

| Diabetes type 1 |               | Diabetes type 2 |                | HT           | OB            | ROS          |                |             |                 |
|-----------------|---------------|-----------------|----------------|--------------|---------------|--------------|----------------|-------------|-----------------|
|                 |               |                 |                |              |               |              |                | Only T1D    |                 |
| ADAM33          | <b>UBQLN4</b> | <b>ACE</b>      | <b>AGT</b>     | ADAMTS       | EIF4E         | <b>ABCC8</b> | ABCC11         | AKR1A1      | <b>AARS</b>     |
|                 |               |                 | AGTR2          |              | USF1          |              | ABCC12         |             | <b>ACAT1</b>    |
|                 |               |                 | <b>EOKFRB2</b> |              | USF2          |              | CRYBB1         |             | <b>ACSS2</b>    |
| AFBP            | <b>IGF1</b>   |                 | COMT           |              |               |              | <b>ENSA</b>    |             | ADH1A           |
| <i>IGFBP1</i>   | <b>IGF2</b>   |                 | KIAA0310       |              |               |              | <b>KCNJ11</b>  |             | ADH1B           |
| <i>PP2C</i>     | <b>MIMF26</b> |                 | LZTR2          | CCL20        | CCL2          |              | KCNJ8          |             | ADH1C           |
| <i>IBF1</i>     | <b>PAEP</b>   |                 |                |              | CCR1          |              | RAPGEF4        |             | ADH4            |
|                 | <b>PAPPA</b>  |                 |                |              | CCR6          |              |                |             | ADH5            |
|                 | <b>SP1</b>    | <b>ADIPOG</b>   | ADIPOR2        |              | CSPG2         |              |                |             | <b>ADK</b>      |
|                 | <b>TF</b>     |                 | <b>CDH9</b>    |              |               |              |                |             | <b>AIFL</b>     |
|                 |               |                 |                | <b>CDH9</b>  | <b>ADIPOG</b> |              | <b>ACACB</b>   | <b>ACLY</b> | <b>AP0A1BP</b>  |
|                 |               |                 |                |              |               |              |                |             | <b>ASCC3L1</b>  |
| AFF3            | AFF2          | <b>AGT</b>      | <b>ACE</b>     |              | <b>NFKB1</b>  |              | ACOX2          |             | <b>ATIC</b>     |
| <i>LAMA1</i>    | SPSB1         |                 | ACE2           |              | RBL2          |              | ACSL3          |             | BCAT1           |
|                 | SPSB4         |                 | AGT            |              |               |              | ACSL4          |             | BCAT2           |
|                 |               |                 | <b>AGTR1</b>   |              |               |              | ACSS2          |             | CTH             |
|                 |               |                 | AGTR2          | COL8A1       | ADCY6         |              | <b>ACTR2</b>   |             | <b>DARS</b>     |
| AIRE            | AIRE          |                 | ASPEP          |              | COL8A2        |              | <b>ADK</b>     |             | <b>EK3A</b>     |
| <i>AIR1</i>     | <b>CREBBP</b> |                 | CMA1           |              | <b>EFEMP2</b> |              | <b>AGPAT2</b>  |             | <b>EK3A2</b>    |
| <i>PSA1</i>     |               |                 | CTSG           |              | ITGA1         |              | ARF1           |             | EXOSC4          |
| <i>AF51</i>     |               |                 | DNPEP          |              | ITGA2         |              | ARF3           |             | <b>FDPS</b>     |
|                 |               |                 | ENPEP          |              | ITIH1         |              | ARF4           |             | <b>GARS</b>     |
|                 |               |                 | EVSR1          |              | KLHL12        |              | ARHGAP12       |             | <b>GRHRP</b>    |
|                 |               |                 | HAT1           |              | KRTAP4-12     |              | ARHGAP9        |             | <b>HOLBP</b>    |
| ALCAM           | ALCAM         |                 | KNG1           |              | <b>PXN</b>    |              | APP2           |             | HSPA4           |
| <i>HEHD</i>     | CD6           |                 | MAS1           |              | <b>UBQLN4</b> |              | ASL            |             | <b>IMPDH1</b>   |
| <i>CD64</i>     | <b>EGFR</b>   |                 | MEP1A          |              | VCL           |              | <b>ATPFC1</b>  |             | <b>IMPDH2</b>   |
|                 |               |                 | NPPB           |              |               |              | ATPSV1A        |             | <b>KARS</b>     |
|                 |               |                 | PPIC           |              |               |              | <b>ATP6V1D</b> |             | <b>KIAA0664</b> |
| AML1            | AKR1C4        |                 | PREP           | EDG1         | <b>AKT1</b>   |              | ATPSV1E1       |             | <b>LCP1</b>     |
| <i>RUN1</i>     | <b>AR</b>     |                 | CBFA2T2        |              | <b>CAV1</b>   |              | ATPSV1E2       |             | <b>MH2</b>      |
| <i>CBFA2</i>    | CBFA2T2       |                 | CBFA2T3        |              | EDG3          |              | ATPBD3         |             | MECR            |
| <i>ANKK1</i>    | CBFA2T3       |                 | CBFB           |              | <b>GNAI1</b>  |              | BCKDK          |             | <b>MP1</b>      |
| <i>ZNF1</i>     | CCND1         |                 | ENPP1          | <b>IINSR</b> | <b>GNAO3</b>  |              | C4orf9         |             | <b>MTHFD1</b>   |
|                 | CCND2         |                 |                |              | HTR1A         |              | <b>CCT2</b>    |             | <b>MTHFDIL</b>  |
|                 | CCND3         |                 |                |              | HTR1D         |              | <b>CCT3</b>    |             | <b>NARS</b>     |
|                 | <b>CEBPB</b>  |                 | EXOSC4         | AKR1A1       | BMD5          |              | <b>CCT5</b>    |             | <b>MPEPPS</b>   |
|                 | <b>CSF2</b>   |                 | (p12A)         |              | C1orf19       |              | <b>CCT6A</b>   |             | <b>PABPC1</b>   |
|                 | ELF2          |                 |                |              | LPP           | <b>ACTN1</b> | <b>CCT6B</b>   |             | <b>PABPC3</b>   |
|                 | EP300         |                 |                |              |               |              | <b>CDS1</b>    |             | <b>PABPC4</b>   |
|                 | ETV6          |                 |                |              |               |              | <b>CDS2</b>    |             | <b>PDCD8</b>    |
|                 | <b>FOS</b>    |                 |                |              |               |              | <b>CDY1</b>    |             | <b>PFAS</b>     |
|                 | <b>IL3</b>    |                 |                |              |               |              | <b>CDY2A</b>   |             | <b>PFKL</b>     |
|                 | <b>JUN</b>    |                 |                |              |               |              | <b>CDYL</b>    |             | <b>PFKM</b>     |
|                 | MDS1          |                 |                |              |               |              | <b>CDYL2</b>   |             | <b>PFKM</b>     |
|                 |               |                 |                |              |               |              |                |             | HT & OB & ROS   |

ALL ?

Minimum number of occurrences: All  freeze Scramble

Individuals

MDC-Y2H

CCSB-Y2H

CCSB-LIT

HPRD-COMP

HPRD-BIN

DIP

BIND

BIOGRID

INTACT

REACTOME

COCIT

ORTHO

HOMOMINT

OPHID

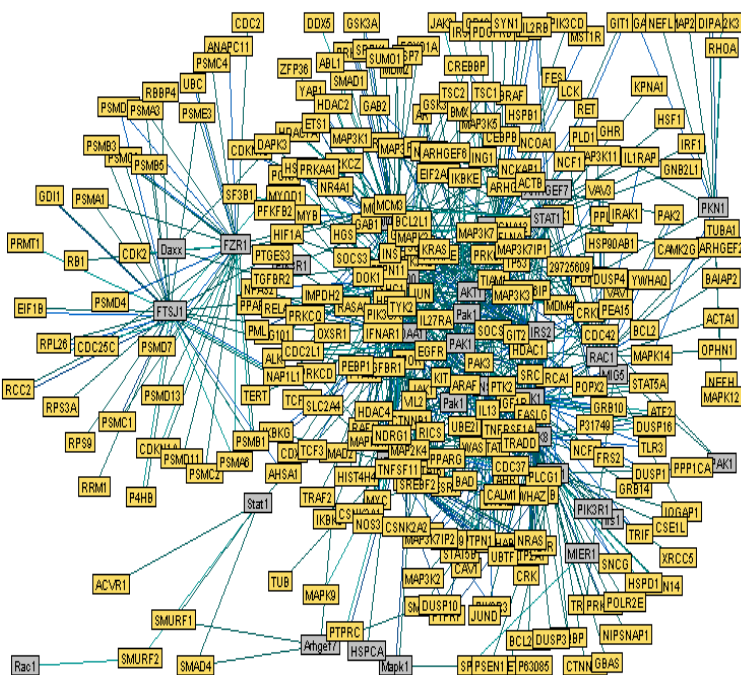

Supplement: 12920_2010_180_MOESM8_ESM.pdf [file 12920_2010_180_MOESM8_ESM.pdf]
