# Supplementary material for: Gene regulatory network reveals oxidative stress as the underlying molecular mechanism of type 2 diabetes and hypertension
Source: Springer Nature journal article supplement (doi:10.1186/1755-8794-3-45), 2010-10-13
Supplement: 12920_2010_180_MOESM5_ESM.pdf [file 12920_2010_180_MOESM5_ESM.pdf]

# Construction of an integrated network for type 2 diabetes

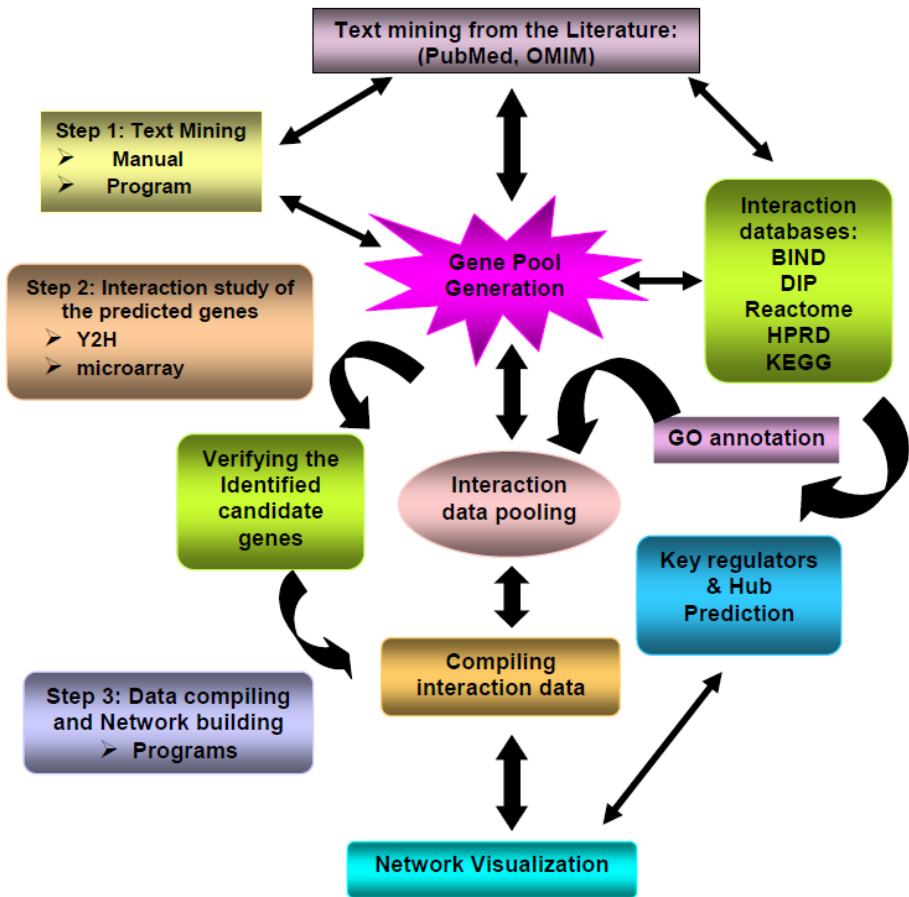

## The "parts list": biomedical literature mining

**Transcriptomics studies:**  
identify the involved genes,  
proteins and their interactions.

**Topological model:**  
gene and protein  
interactions from  
interaction databases

**All fetched interactions:**  
filtered against expt. data  
sets

**Functional annotation:** using  
computational approaches
