# Supplementary material for: Gene regulatory network reveals oxidative stress as the underlying molecular mechanism of type 2 diabetes and hypertension
Source: Springer Nature journal article supplement (doi:10.1186/1755-8794-3-45), 2010-10-13
Supplement: 12920_2010_180_MOESM6_ESM.pdf [file 12920_2010_180_MOESM6_ESM.pdf]

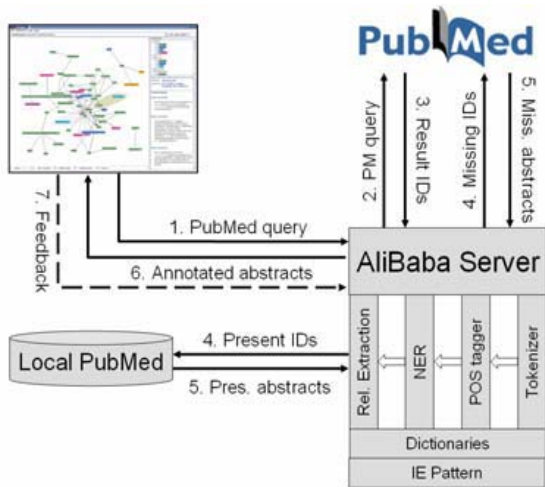

A. Workflow of AliBaba

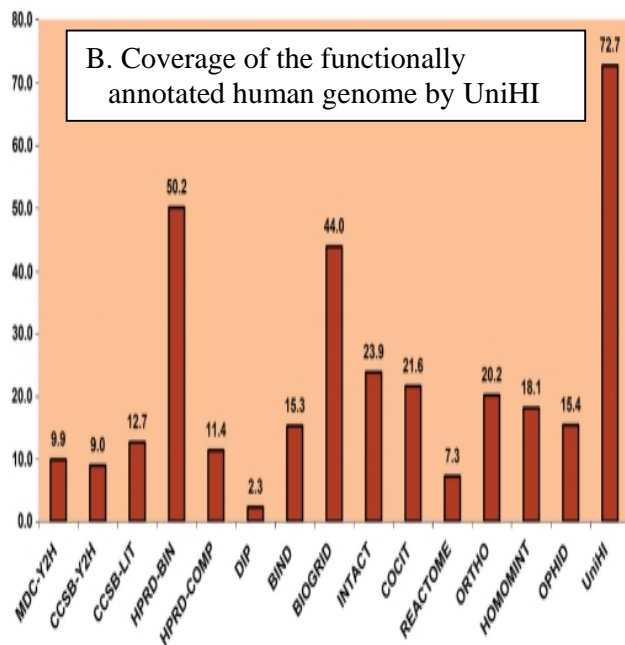

Filter by Tissue specific expression data

Select Tissue: Brain

Enter cutoff value: 100

Filter by Network: AP Network

Update Network

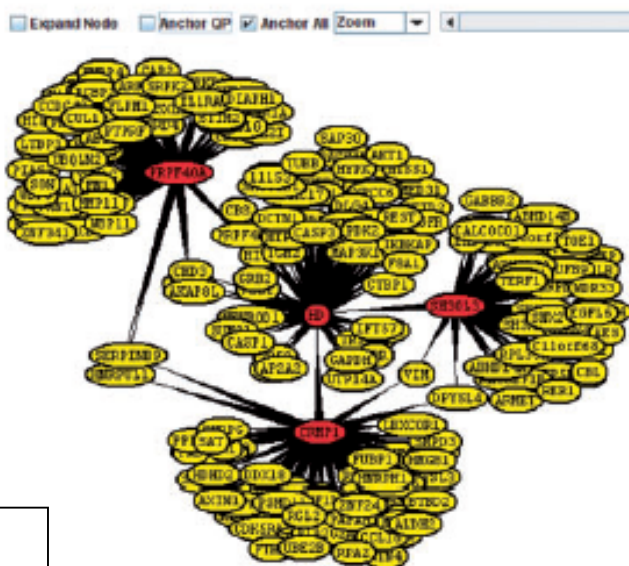

C. Network visualization using UniHI
