# Supplementary material for: Gene regulatory network reveals oxidative stress as the underlying molecular mechanism of type 2 diabetes and hypertension
Source: Springer Nature journal article supplement (doi:10.1186/1755-8794-3-45), 2010-10-13
Supplement: 12920_2010_180_MOESM7_ESM.pdf [file 12920_2010_180_MOESM7_ESM.pdf]

Information

Objects Texts

- Proteins (53)
- Species (5)
- Cells (10)
- Diseases (25)
- Tissues (4)

Diseases: [diabetes mellitus](#)

Textual Evidence

PMID: [19232954](#)

The potential utility of venous endothelial biopsy technique in evaluating the mechanisms that mediate the effects of systemic conditions such as **diabetes mellitus**, **sleep apnea**, and **obesity on the vascular endothelium** will also be discussed. [\[more\]](#)

PMID: [10145777](#)

Trees:  Text:  Feedback mode

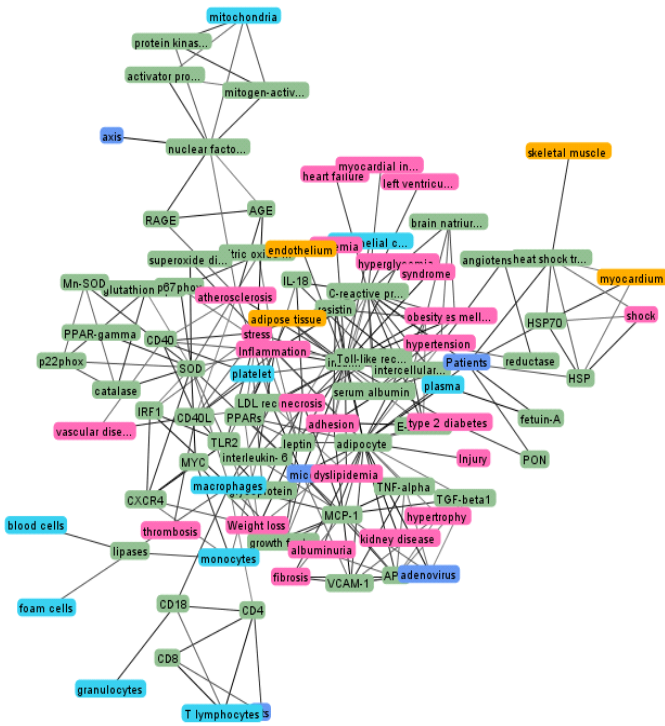

|    | T2D     | HT       | OB     | ROS                     |                      |
|----|---------|----------|--------|-------------------------|----------------------|
| 3  |         |          |        |                         |                      |
| 4  |         |          |        |                         |                      |
| 5  | 19AJ    | ABCA10   | 19AJ   | AKR1A1                  | HT & ROS             |
| 6  | Acbd4   | ABL1     | A4GALT | AKR1C1                  |                      |
| 7  | ACDC    | ACE      | ABCC8  | ALOXE                   | T2D & ROS            |
| 8  | ACE     | ADAMTSL3 | ACACB  | Ang II                  |                      |
| 9  | ADAMTS9 | AGT      | ACE    | Angiotensin II          | T2D & HT             |
| 10 | ADD1    | AGTR1    | ACH    | Catalase peroxidase     |                      |
| 11 | ADIPOQ  | AKT1     | ACP1   | CYBA                    | T2D & HT & ROS       |
| 12 | ADM     | ALDOB    | ADA    | D-amino acid oxidase    |                      |
| 13 | ADRB2   | AP1M1    | ADRA2A | fatty acyl-CoA oxidase  | T2D & OB             |
| 14 | ADSL    | AP1S1    | ADRA2B | FOXO1                   |                      |
| 15 | AGER    | AR       | ADRB1  | glycolate oxidase       | T2D & HT & OB        |
| 16 | AGT     | ARMC1    | ADRB2  | GFX                     |                      |
| 17 | AGTR1   | BCAR1    | ADRB3  | hematin                 | T2D & OB & ROS       |
| 18 | AKT1    | BMP2     | AGP2   | heme                    |                      |
| 19 | AKT2    | C7       | AGRP   | heme oxygenases         | T2D & HT & OB & ROS  |
| 20 | ALMS1   | CAMK4    | AGS    | HFE                     |                      |
| 21 | ANK1    | CASP3    | AGT    | ICAM1                   | HT & OB & ROS        |
| 22 | ANK3    | CCL20    | AHO    | IFN-g                   |                      |
| 23 | AP3S1   | CCNB1    | AHO2   | IL1b                    | HT & OB              |
| 24 | APOD    | CD2AP    | AK1    | IRS1                    |                      |
| 25 | APOE    | CDC2     | ALMS1  | L-a-hydroxyacid oxidase | T1D & ROS            |
| 26 | AQP3    | CDGAP    | ANCR   | LOX1                    |                      |
| 27 | AR      | CDH13    | ANMA   | MPO                     | T1D & Obesity        |
| 28 | ARHC    | CDS1     | APM1   | NAD(P)H oxidases        |                      |
| 29 | BAD     | CNTN4    | APOA1  | NADPH oxidase           | T1D & T2D & Obesity  |
| 30 | BCL2    | CNTNAP5  | APOA2  | NO synthase             |                      |
| 31 | Becn1   | COL8A1   | APOA4  | MOS2A                   | T1D & T2D            |
| 32 | BRCA1   | CTDSPL   | APOB   | NOS3                    |                      |
| 33 | Btg2    | CYP11B2  | APOC1  | OGG1                    | T1D & T2D & HT & ROS |
| 34 | CAPN10  | DCK      | APOD   | PDGF                    |                      |
| 35 | CAPN3   | EDG1     | APOE   | peroxidases             | T1D & HT             |
| 36 | CAV1    | ESR1     | AR     | PI3K                    |                      |
| 37 | CAV3    | EXOC4    | ASIP   | PIG6                    | T1D & T2D & ROS      |
| 38 | CBL     | FAM32A   | ATP1A2 | PIM1                    |                      |
| 39 | CCNE1   | FXR2     | ATRN   | PKC                     | ALL                  |
