# Supplementary figures and images for: Gene regulatory network reveals oxidative stress as the underlying molecular mechanism of type 2 diabetes and hypertension
Source: Springer Nature journal article supplement (doi:10.1186/1755-8794-3-45), 2010-10-13

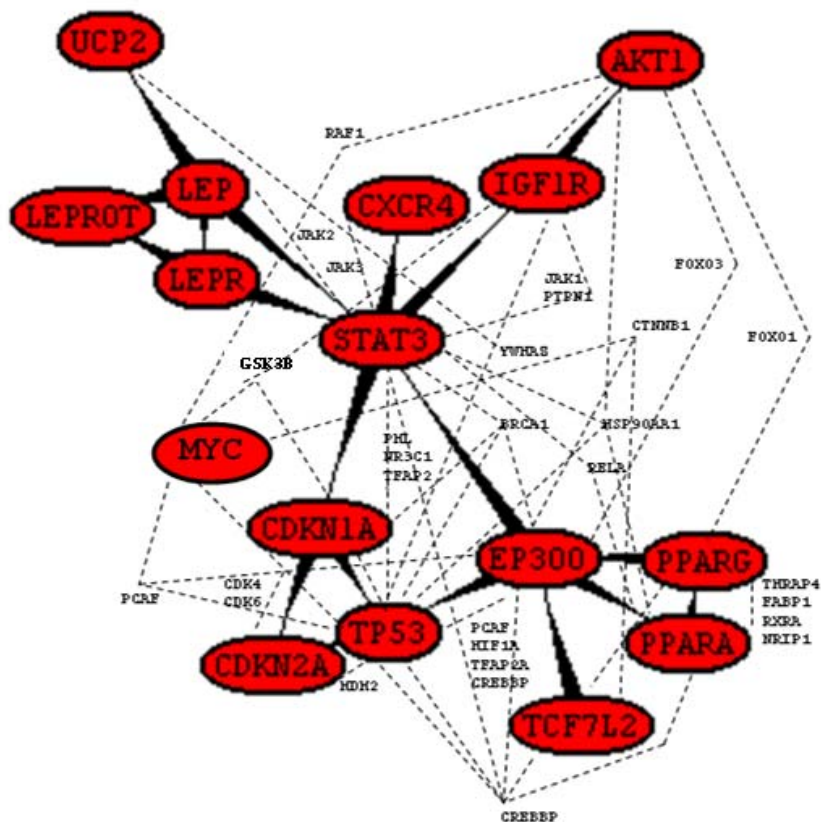

Supplement: 12920_2010_180_MOESM12_ESM.pdf [file 12920_2010_180_MOESM12_ESM.pdf]

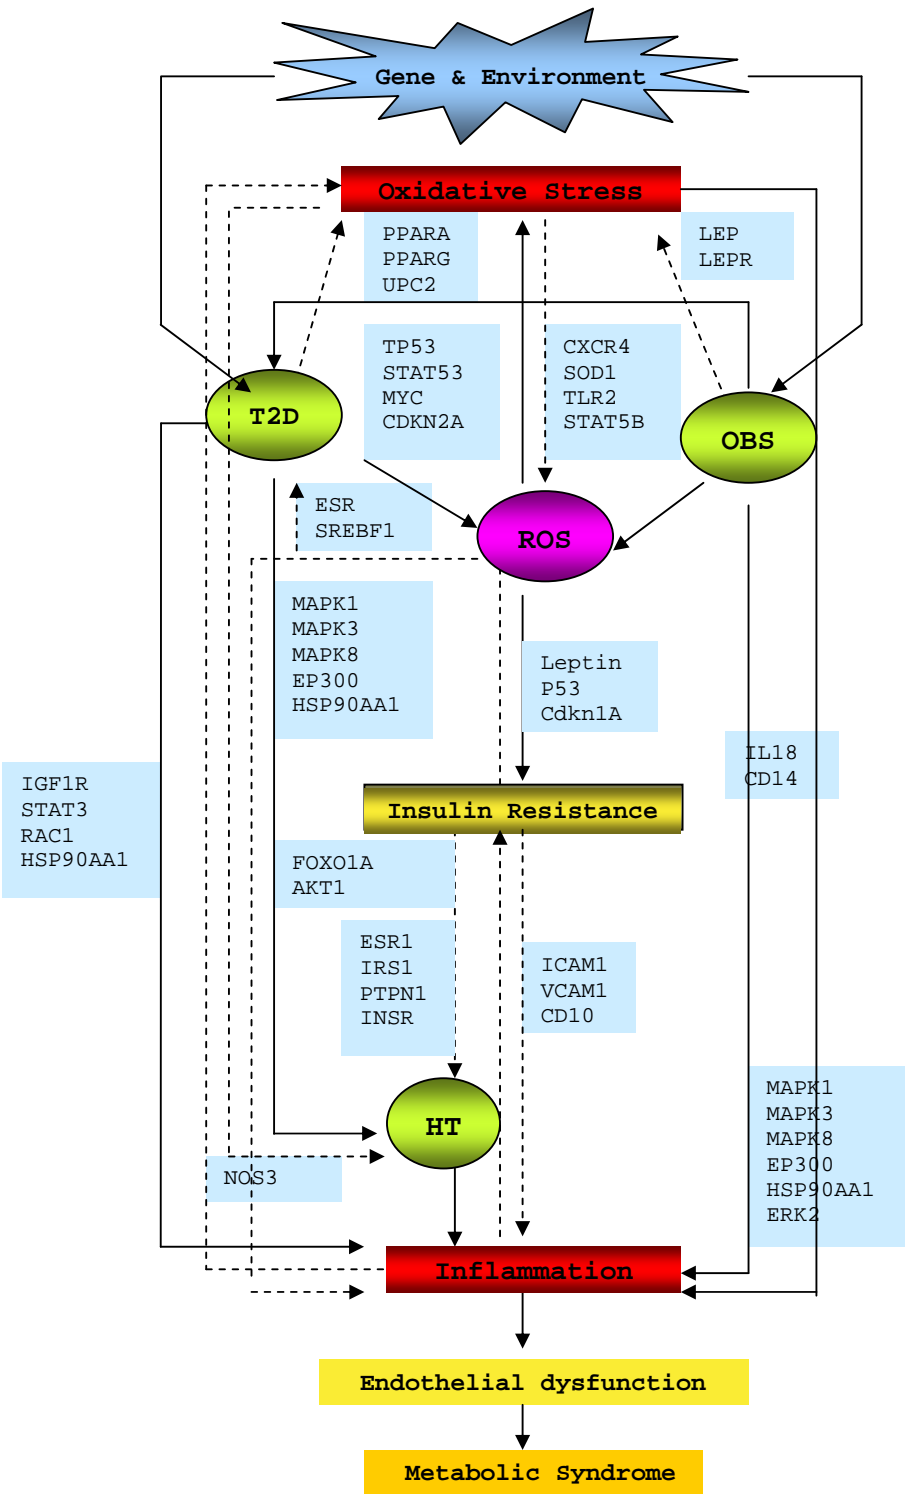

Supplement: 12920_2010_180_MOESM13_ESM.pdf [file 12920_2010_180_MOESM13_ESM.pdf]

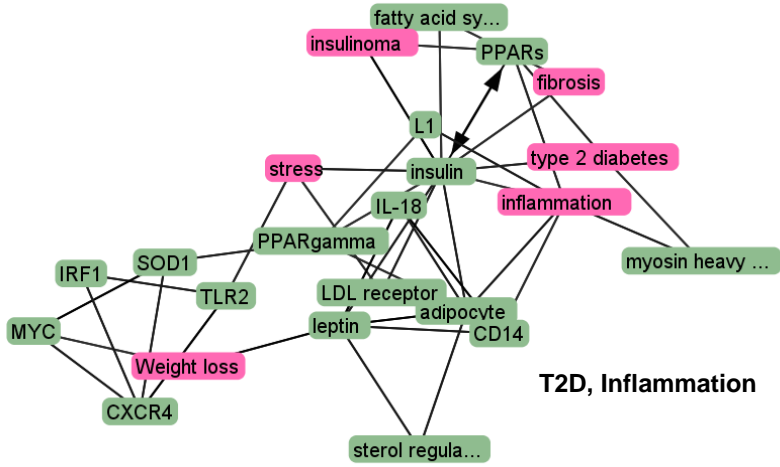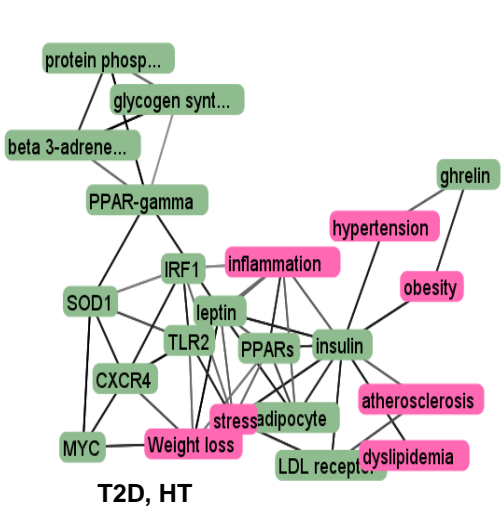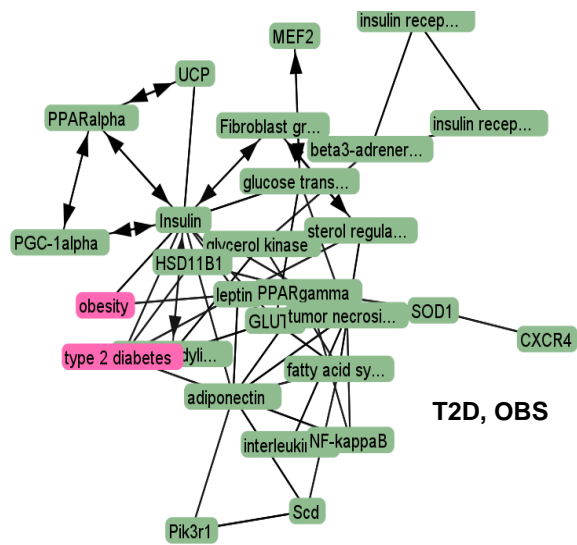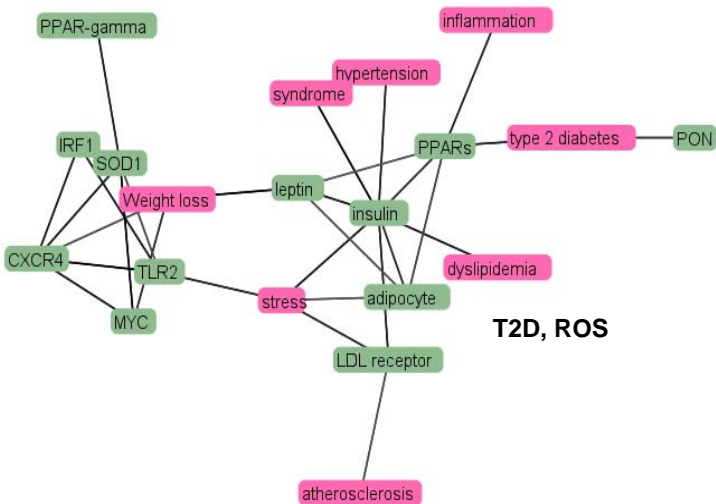

Supplement: 12920_2010_180_MOESM9_ESM.pdf [file 12920_2010_180_MOESM9_ESM.pdf]
